# Supplementary material
Source: PubMed Central journal article supplement (PMC4250166)
Supplement: pnas.201404047SI.pdf [file pnas.201404047SI.pdf]

# Supporting Information

Midonet et al. 10.1073/pnas.1404047111

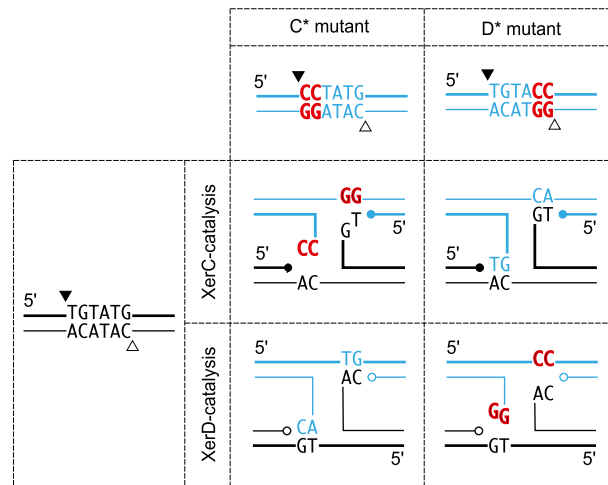

**Fig. S1.** C\* and D\* recombination sites that prevent XerC and XerD strand exchanges, respectively. WT recombination sites (black) and a mutated recombination site (blue) are indicated; mutations are indicated in bold and red. XerC (▼) and XerD (△) cleavage sites and XerC (●) and XerD (○) 3'-phosphotyrosyl links are indicated. A space between opposed bases indicates no stabilization by Watson–Crick or Wobble base-pairing interactions.

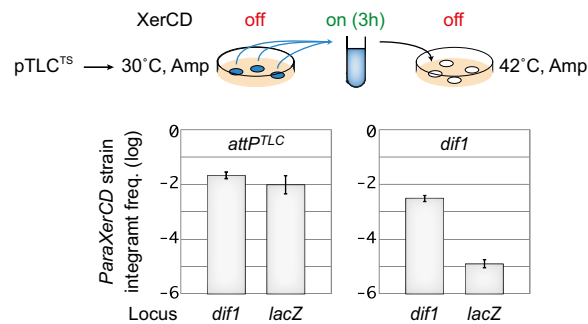

**Fig. S2.** TLC $\phi$  integration is not spatially restricted. Frequency of integrants after 3 h of growth at the permissive temperature in production of recombinases from a *xerC-xerD* operon under the pAra promoter integrated at the *xerC* locus ( $p_{ara}XerCD$ ) cells. The legend is as in Fig. 3C.

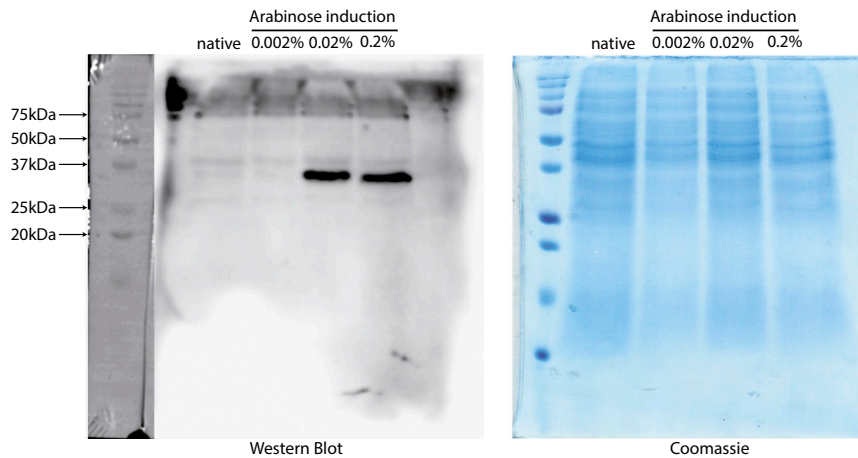

**Fig. S3.** Western blot analysis of strains carrying tagged XerD. Native, protein extract from cells producing 6His-XerD under the native promoter at the *xerD* locus; Arabinose induction, protein extract from cells producing XerC and 6His-XerD from an operon under the arabinose-inducible promoter inserted at the *xerC* locus. Cells were grown for 3 h in LB supplemented with 0.002%, 0.02%, or 0.2% arabinose. Cells were broken in 400  $\mu$ L of boiling 10% SDS before Laemmli treatment. Proteins were separated on a 14% acrylamide/bisacrylamide (29:1) SDS/PAGE gel. Two gels with the same amount of samples were done in parallel for Coomassie coloration and for transfer (Western blot). Blocking of the membrane was in TBS-Tween 0.1% + 5% milk. Washing steps were in TBS-Tween 0.1%. The primary antibody was anti-Tetra-His of mouse, and the secondary antibody was goat X-mouse HRP (Biorad), and they were used at a ratio of 1:1,000 in blocking buffer. The signals were detected with the SuperSignal West Pico Chemiluminescent Substrate (Pierce) with a LAS3000 image reader (GE Healthcare). The molecular mass of 6His-XerD is 36.7 kDa. Bands were quantified using ImageJ (NIH). Arabinose (0.02% and 0.2%) led to 100-fold more XerD than native promoter.

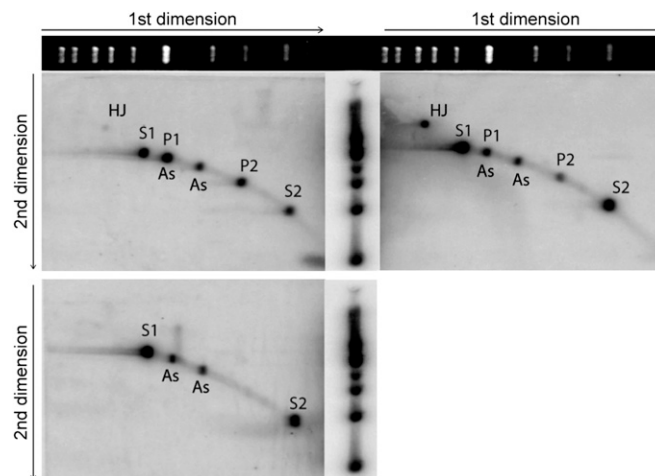

**Fig. S4.** HJ intermediate resolution by XerC catalysis. Plasmid intramolecular recombination between *diff1* and *attP<sup>TLC</sup>* was induced for 3 h using 0.2% arabinose. The total genomic DNA of the strains was extracted and separated in the first dimension on a 0.7% agarose gel and in the second dimension on a 1.4% agarose gel in the presence of 10  $\mu$ g/mL ethidium bromide. (Top Left) Plasmid carrying a WT *attP<sup>TLC</sup>* site. (Top Right) Plasmid carrying a C\*-modified *attP<sup>TLC</sup>* site. (Bottom Left) Plasmid carrying a D\*-modified *attP<sup>TLC</sup>* site. The radiolabeled plasmid was used as a probe for the assay. Horizontal scale: 1-kb ladder. Vertical scale: 1-kb ladder partially revealed by the Southern blot. S1, S2, P1, and P2 are plasmid substrate and products digested by HpaI and AlwNI. As, nonspecific labeling (also observed in cells lacking the plasmid).

**Table S1. Plasmids**

| Name                               | Derived from                    | Properties                                                                                                                                                                                                                                                                                                                            | Source                |
|------------------------------------|---------------------------------|---------------------------------------------------------------------------------------------------------------------------------------------------------------------------------------------------------------------------------------------------------------------------------------------------------------------------------------|-----------------------|
| pBS90                              | pSW23T                          | Ori R6K, Cm <sup>R</sup> , carrying replicative form of TLC                                                                                                                                                                                                                                                                           | This study            |
| pBS126                             | pSW23T                          | Ori R6K, Cm <sup>R</sup> , carrying suicide form of TLC (stop mutation in Cri = TLC*)                                                                                                                                                                                                                                                 | This study            |
| pCM33                              | pSW23T                          | Ori R6K, Cm <sup>R</sup> , with partial suicide TLC, efficient for integration                                                                                                                                                                                                                                                        | This study            |
| pCM39                              | pSW23T                          | Ori R6K, Cm <sup>R</sup> , partial suicide TLC with <i>attP<sup>TLC</sup>C*</i>                                                                                                                                                                                                                                                       | This study            |
| pCM40                              | pSW23T                          | Ori R6K, Cm <sup>R</sup> , partial suicide TLC with <i>attP<sup>TLC</sup>D*</i>                                                                                                                                                                                                                                                       | This study            |
| pCM43                              | pSC101 <i>repA<sup>TS</sup></i> | TS vector, Amp <sup>R</sup> , partial suicide TLC                                                                                                                                                                                                                                                                                     | This study            |
| pCM41                              | pSC101 <i>repA<sup>TS</sup></i> | TS vector, Amp <sup>R</sup> , partial suicide TLC with <i>attP<sup>TLC</sup>C*</i>                                                                                                                                                                                                                                                    | This study            |
| pCM42                              | pSC101 <i>repA<sup>TS</sup></i> | TS vector, Amp <sup>R</sup> , partial suicide TLC with <i>attP<sup>TLC</sup>D*</i>                                                                                                                                                                                                                                                    | This study            |
| pCM13                              | pSC101 <i>repA<sup>TS</sup></i> | TS vector, Amp <sup>R</sup> , with <i>dif1</i> site                                                                                                                                                                                                                                                                                   | This study            |
| pCM18                              | pSC101 <i>repA<sup>TS</sup></i> | TS vector, Amp <sup>R</sup> , with <i>dif1</i> C* site                                                                                                                                                                                                                                                                                | This study            |
| pCM19                              | pSC101 <i>repA<sup>TS</sup></i> | TS vector, Amp <sup>R</sup> , with <i>dif1</i> D* site                                                                                                                                                                                                                                                                                | This study            |
| pBS79                              | pSW23T                          | Ori R6K, Cm <sup>R</sup> , with <i>dif1</i> site                                                                                                                                                                                                                                                                                      | This study            |
| pBS114                             | pSW23T                          | Ori R6K, Cm <sup>R</sup> , with <i>dif1</i> C*                                                                                                                                                                                                                                                                                        | This study            |
| pBS115                             | pSW23T                          | Ori R6K, Cm <sup>R</sup> , with <i>dif1</i> D*                                                                                                                                                                                                                                                                                        | This study            |
| pBS66                              | pSW23T                          | Ori R6K, Cm <sup>R</sup> , CTX $\phi$ deleted for morphogenic genes, efficient for integration                                                                                                                                                                                                                                        | (2)                   |
| pCM56                              | pSW23T                          | Ori R6K, Cm <sup>R</sup> , carrying <i>sacB</i> gene, with suicide TLC                                                                                                                                                                                                                                                                | This study            |
| pEP68                              | pSW23T                          | Ori R6K, Cm <sup>R</sup> , <i>attP<sup>CTX</sup>(+)</i> + suicide TLC $\phi$ <i>attP</i> + <i>sacB</i>                                                                                                                                                                                                                                | This study            |
| pCM105                             | pSW23T                          | Ori R6K, Cm <sup>R</sup> , <i>attP<sup>CTX</sup>(+)</i> + suicide TLC $\phi$ <i>attP</i> C* + <i>sacB</i>                                                                                                                                                                                                                             | This study            |
| pCM106                             | pSW23T                          | Ori R6K, Cm <sup>R</sup> , <i>attP<sup>CTX</sup>(+)</i> + suicide TLC $\phi$ <i>attP</i> D* + <i>sacB</i>                                                                                                                                                                                                                             | This study            |
| pCM103                             | pUC18                           | Vector, Amp <sup>R</sup> , partial suicide TLC with <i>attP<sup>TLC</sup></i> and <i>dif1</i> in direct orientation                                                                                                                                                                                                                   | This study            |
| pCM116                             | pUC18                           | Vector, Amp <sup>R</sup> , partial suicide TLC with <i>attP<sup>TLC</sup>C*</i> and <i>dif1</i> in direct orientation                                                                                                                                                                                                                 | This study            |
| pCM117                             | pUC18                           | Vector, Amp <sup>R</sup> , partial suicide TLC with <i>attP<sup>TLC</sup>D*</i> and <i>dif1</i> in direct orientation                                                                                                                                                                                                                 | This study            |
| pMEV69                             | pDS132                          | Integration/excision vector with UP and DWN regions of <i>lacZ</i> , to make $\Delta_{vib/lacZ}$ strains                                                                                                                                                                                                                              | Laboratory collection |
| pUXBF13 and pTn7 hapR <sup>+</sup> |                                 | Complemented <i>hapR</i> + Gm <sup>R</sup>                                                                                                                                                                                                                                                                                            | (3)                   |
| pCM011a                            | pUC18                           | Vector for natural transformation to have <i>dif1</i> -prophages:: <i>Ec-lacZa-dif1-lacZb</i>                                                                                                                                                                                                                                         | This study            |
| pBJ31                              |                                 | pDS132-derived integration/excision vector to replace the <i>V. cholerae xerC</i> gene by an arabinose-inducible version ( <i>araC-xerC-lacI-aadA1</i> )oriR6K, spec <sup>R</sup> , cm <sup>R</sup>                                                                                                                                   | (4)                   |
| pCM54                              | pUC18                           | Vector of natural transformation carrying <i>SmR</i> (spec <sup>R</sup> ), <i>lacI</i> , <i>araC</i> , and <i>vibXerCD</i> under <i>ara</i> promoter, flanking by UP and DWN regions of homologies around <i>vibXerC</i> (1 kb). Replace <i>vibXerC</i> by arabinose-inducible <i>vibXerCD</i> , Spec <sup>R</sup> , Amp <sup>R</sup> | This study            |
| pGD191                             | pSC101                          | Vector of natural transformation to delete the gamma domain of FtsK, Zeo <sup>R</sup> , Amp <sup>R</sup>                                                                                                                                                                                                                              | This study            |
| pBS98                              | pUC18                           | Vector of natural transformation carrying <i>sh ble</i> gene (zeo <sup>R</sup> ) between UP and DWN region of homologies around <i>vibXerD</i> (1 kb); serves to remove <i>vibXerD</i>                                                                                                                                                | This study            |
| pBS104                             | pDS132                          | Integration/excision vector to replace <i>vibXerD</i> by <i>vibXerD<sub>YF</sub></i>                                                                                                                                                                                                                                                  | This study            |
| pBS99                              | pKAS32                          | Integration/excision vector with UP and DWN regions of <i>vibXerD</i> and <i>sh ble</i> gene between them, to delete <i>vibXerD</i>                                                                                                                                                                                                   | This study            |
| pBS105                             | pDS132                          | Integration/excision vector to replace <i>vibXerC</i> by <i>xerC<sub>YF</sub></i>                                                                                                                                                                                                                                                     | This study            |
| pMEV245                            | pDS132                          | pDS132 carrying the <i>arr2</i> (Rif <sup>R</sup> ) cassette flanked by the upstream and downstream regions of <i>vibXerC</i> , Cm <sup>R</sup>                                                                                                                                                                                       | (1)                   |
| pKAS32                             |                                 | <i>rpsL</i> ( <i>Strep<sup>S</sup></i> ), OriR6K, <i>bla</i> (Amp <sup>R</sup> ), oriT                                                                                                                                                                                                                                                | (5)                   |
| pBJ37                              | pDS132                          | Integration/excision vector to replace <i>vib/lacZ::Ec-lacZa-dif1-lacZb</i>                                                                                                                                                                                                                                                           | (1)                   |
| pMEV70                             | pDS132                          | Integration/excision vector to replace <i>dif1</i> -prophages:: <i>aaAd1</i>                                                                                                                                                                                                                                                          |                       |
| pCM144                             | pUC18                           | Vector of natural transformation to replace <i>XerD::FRT-sh ble-FRT</i> (Zeo <sup>R</sup> )                                                                                                                                                                                                                                           | This study            |
| pCM145                             | pUC18                           | Vector of natural transformation to have $\Delta_{vibXerC}::pAra_{vibXerC-6His}_{vibXerD}$                                                                                                                                                                                                                                            | This study            |
| pCM146                             | pUC18                           | Vector of natural transformation to have $\Delta_{vibXerD}::6His_{vibXerD}$ under native promoter                                                                                                                                                                                                                                     | This study            |

AmpR, ampicillin resistance; CmR, chloramphenicol resistance; KnR, kanamycin resistance; RifR, rifampicin resistance; SmR, spectinomycin resistance; SrepS, streptomycin sensitivity; zeoR, zeocin resistance.

- Das B, Bischerour J, Barre F-X (2011) VGJphi integration and excision mechanisms contribute to the genetic diversity of *Vibrio cholerae* epidemic strains. *Proc Natl Acad Sci USA* 108(6): 2516–2521.
- Bao Y, Lies DP, Fu H, Roberts GP (1991) An improved Tn7-based system for the single-copy insertion of cloned genes into chromosomes of gram-negative bacteria. *Gene* 109(1):167–168.
- Demarre G, et al. (2014) Differential management of the replication terminus regions of the two *Vibrio cholerae* chromosomes during cell division. *PLoS Genet* 10(9):e1004557.
- Das B, Bischerour J, Val M-E, Barre F-X (2010) Molecular keys of the tropism of integration of the cholera toxin phage. *Proc Natl Acad Sci USA* 107(9):4377–4382.
- Skorupski K, Taylor RK (1996) Positive selection vectors for allelic exchange. *Gene* 169(1):47–52.

**Table S2. Xer recombination promotes a conservative recombination event that leads to the joint excision of TLC $\phi$  and CTX $\phi$** 

| Xer status       | Blue colonies                                           |                                   | White colonies                                                |                                   |                 |                 |                                   |
|------------------|---------------------------------------------------------|-----------------------------------|---------------------------------------------------------------|-----------------------------------|-----------------|-----------------|-----------------------------------|
|                  | Frequency                                               | Cm <sup>S</sup> , Kn <sup>S</sup> | Frequency                                                     | Cm <sup>S</sup> , Kn <sup>S</sup> | Kn <sup>S</sup> | Cm <sup>S</sup> | Cm <sup>R</sup> , Kn <sup>R</sup> |
| Xer <sup>+</sup> | 2.8 × 10 <sup>-4</sup> (in 2.7 × 10 <sup>7</sup> cells) | 100%<br>(246/246)                 | 2.0 × 10 <sup>-5</sup><br>(in 2.9 × 10 <sup>6</sup> cells)    | 66% (71/108)                      | 7.4% (8/108)    | 15% (16/108)    | 11.6% (13/108)                    |
| Xer <sup>-</sup> | <10 <sup>-6</sup> (in 1.6 × 10 <sup>6</sup> cells)      | —                                 | 2.2 × 10 <sup>-5</sup><br>(in of 1.6 × 10 <sup>6</sup> cells) |                                   |                 |                 |                                   |

Cm<sup>S</sup>, chloramphenicol sensitive; Kn<sup>S</sup>, ksamycin sensitive.

**Table S3. *Vibrio cholerae* strains**

| Name   | Genotype                                                                                                                                                                                                                        | Source     |
|--------|---------------------------------------------------------------------------------------------------------------------------------------------------------------------------------------------------------------------------------|------------|
| BS47   | CVC301 (N16961 StrR Pcp18 araE); $\Delta lacZ \Delta dif1$ -prophages:: <i>Ec</i> lacZa-difA-lacZb                                                                                                                              | This study |
| BS1    | CVC301 (N16961 StrR Pcp18 araE); $\Delta lacZ \Delta dif1$ -prophages:: <i>Ec</i> lacZa-dif1-lacZb; $\Delta dif2::aad1$                                                                                                         | (1)        |
| BS3    | CVC301 (N16961 StrR Pcp18 araE); $\Delta lacZ, \Delta dif1$ -prophages:: <i>Ec</i> lacZa-dif1-lacZb; $\Delta dif2::aad1$                                                                                                        | (1)        |
| BS10   | CVC301 (N16961 StrR Pcp18 araE); $\Delta lacZ \Delta dif1$ -prophages:: <i>Ec</i> lacZa-dif1-lacZb; $\Delta dif2::aad1$ ; $\Delta xerC::rif$                                                                                    | (1)        |
| BS49   | CVC301 (N16961 StrR Pcp18 araE); $\Delta lacZ \Delta dif1$ -prophages:: <i>Ec</i> lacZa-dif1-lacZb; $\Delta dif2::aad1$ ; $\Delta xerD::zeo$                                                                                    | This study |
| EPV366 | N16961 $\Delta lacZ$ ; ChapR $\Delta dif1$ -prophages:: <i>Ec</i> lacZa-dif1-lacZb $\Delta xerC::p_{ara}XerCD-Spec^R$                                                                                                           | This study |
| CMV26  | N16961; ChapR; $\Delta dif1$ -prophages:: <i>Ec</i> lacZa-dif1-lacZb-FRT-sh ble-FRT (Zeo <sup>R</sup> ); $\Delta xerC::p_{ara}XerCD-Spec^R$                                                                                     | This study |
| BS50   | CVC301 (N16961 StrR Pcp18 araE); $\Delta dif1$ -prophages:: <i>Ec</i> lacZa-dif1-lacZb;; $\Delta dif2::aad1$ ; XerD::XerDyF catalytic mutant                                                                                    | This study |
| BS51   | CVC301 (N16961 StrR Pcp18 araE); $\Delta lacZ, dif1$ -prophages:: <i>Ec</i> lacZa-dif1-lacZb;; $\Delta dif2::aad1$ ; XerC::XerCyF catalytic mutant                                                                              | This study |
| CMV01  | N16961; $\Delta lacZ$ ; ChapR; $dif1$ -prophages:: <i>Ec</i> lacZa-dif1-lacZb-FRT-sh ble-FRT (Zeo <sup>R</sup> )                                                                                                                | This study |
| CMV13  | N16961; $\Delta lacZ$ ; ChapR; $dif1$ -prophages:: <i>Ec</i> lacZa-dif1-lacZb, XerC::p <sub>ara</sub> XerC-Spec <sup>R</sup>                                                                                                    | This study |
| CMV14  | N16961; $\Delta lacZ$ ; ChapR; $dif1$ -prophages:: <i>Ec</i> lacZa-dif1-lacZb, XerC::p <sub>ara</sub> XerC-Spec <sup>R</sup> ; ftsk $\Delta\gamma::sh ble$ (Zeo <sup>R</sup> )                                                  | This study |
| CMV30  | N16961; $\Delta lacZ$ ; ChapR; $dif1$ -prophages:: <i>Ec</i> lacZa-dif1-lacZb, XerC::p <sub>ara</sub> XerCD-Spec <sup>R</sup> ; $\Delta XerD::sh ble$ (Zeo <sup>R</sup> )                                                       | This study |
| CMV20  | N16961; $\Delta lacZ$ ; ChapR; $dif1$ -prophages:: <i>Ec</i> lacZa-dif1-lacZb, XerC::p <sub>ara</sub> XerC-Spec <sup>R</sup> ; with suicide TLC-sacB integrated at <i>dif1</i>                                                  | This study |
| CMV21  | N16961; $\Delta lacZ$ ; ChapR; $dif1$ -prophages:: <i>Ec</i> lacZa-dif1-lacZb, XerC::p <sub>ara</sub> XerC-Spec <sup>R</sup> ; ftsk $\Delta\gamma::sh ble$ (Zeo <sup>R</sup> ); with suicide TLC-sacB integrated at <i>dif1</i> | This study |
| CMV36  | N16961; $\Delta lacZ$ ; ChapR; $dif1$ -prophages:: <i>Ec</i> lacZa-dif1-lacZb, XerC::p <sub>ara</sub> XerCD-Spec <sup>R</sup> ; $\Delta XerD::sh ble$ (Zeo <sup>R</sup> ); with suicide TLC-sacB integrated at <i>dif1</i>      | This study |
| EPV158 | N16961; $\Delta lacZ$ ; ChapR; $dif1$ and prophages:: <i>Ec</i> lacZa-dif1-lacZb-FRT-sh ble-FRT (Zeo <sup>R</sup> ); with integrated pEP68 at <i>dif1</i> (integration by attP <sup>CTX</sup> )                                 | This study |
| CMV34  | N16961; $\Delta lacZ$ ; ChapR; $dif1$ -prophages:: <i>Ec</i> lacZa-dif1-lacZb-FRT-sh ble-FRT (Zeo <sup>R</sup> ); with integrated pCM105 at <i>dif1</i> (integration by attP <sup>CTX</sup> )                                   | This study |
| CMV35  | N16961; $\Delta lacZ$ ; ChapR; $dif1$ and prophages:: <i>Ec</i> lacZa-dif1-lacZb-FRT-sh ble-FRT (Zeo <sup>R</sup> ); with integrated pCM106 at <i>dif1</i> (integration by attP <sup>CTX</sup> )                                | This study |
| EPV361 | N16961; $\Delta lacZ$ ; ChapR; $\Delta xerC::p_{ara}XerC-6HisXerD-Spec^R$ ; $\Delta xerD::FRT-sh ble-FRT$ (Zeo <sup>R</sup> )                                                                                                   | This study |
| EPV363 | N16961; $\Delta lacZ$ ; ChapR; $\Delta xerD::6HisXerD$                                                                                                                                                                          | This study |

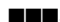

1. Das B, Bischerour J, Val M-E, Barre F-X (2010) Molecular keys of the tropism of integration of the cholera toxin phage. *Proc Natl Acad Sci USA* 107(9):4377–4382.

**Table S4. Oligonucleotides**

| Oligo | Used for                                   | Sequence                                |
|-------|--------------------------------------------|-----------------------------------------|
| 1266  | Check CTX $\phi$ -Kn integration           | CACGACGATTCACCTCAACCTTCC                |
| 1398  | Check CTX $\phi$ -Kn integration           | TTCGACGTTTCAGACGTAGTG                   |
| 1940  | <i>dif1</i> C* mutation                    | CGATAGTGCGCATTACCTATGTTATGTTAAATTAAT    |
| 1941  | <i>dif1</i> C* mutation                    | CGATTAATTTAACATAACATAGGTAATGCGCACTAT    |
| 1942  | <i>dif1</i> D* mutation                    | CGATAGTGCGCATTATGTACCTTATGTTAAATTAAT    |
| 1943  | <i>dif1</i> D* mutation                    | CGATTAATTTAACATAAAGGTACATAATGCGCACTAT   |
| 1944  | <i>attP<sup>TLC</sup></i> C* mutation      | GGTAATGCGCACTAGGATC                     |
| 1945  | <i>attP<sup>TLC</sup></i> C* mutation      | TATGTAGAGAAAGTGAAGAC                    |
| 1946  | <i>attP<sup>TLC</sup></i> D* mutation      | GGTACATAATGCGCACTAGG                    |
| 1947  | <i>attP<sup>TLC</sup></i> D* mutation      | TAGAGAAAGTGAAGACTACG                    |
| 1878  | TLC amplification on <i>N16961</i>         | CCGTCTAGAGCTAGGAACATTTTGTCTCTAGG        |
| 1879  | TLC amplification on <i>N16961</i>         | CCGGATCCTAGTGCGCATTATGTATGTAGAG         |
| 1899  | Check <i>attP<sup>CTX</sup></i> integrants | GTCTCGTTGCTGCATAAACC                    |
| 2479  | Check <i>attP<sup>CTX</sup></i> integrants | CCCAGCTCTCAAAGCTCAGCCTCTAC              |
| 477   | Check TLC $\phi$ -CTX $\phi$ excision      | CGCAGGCTTCTGCTTCAATC                    |
| 1565  | Check TLC $\phi$ -CTX $\phi$ excision      | cggcgtttcatctgtggtgc                    |
| 1297  | <i>dif1</i> gel shift                      | ATCAGTGCGCATTATGTATGTTATGTTAAATGGA      |
| 1298  | <i>dif1</i> gel shift                      | CTGTCCATTTAACATAACATACATAATGCGCACTGAT   |
| 1958  | <i>attP<sup>TLC</sup></i> gel shift        | ACGTCTAGTGCGCATTATGTATGTAGAGAAAGTGGACGT |
| 1959  | <i>attP<sup>TLC</sup></i> gel shift        | ACGTCCACTTTCTCTACATACATAATGCGCACTAGACG  |
